# Supplementary material for: Ruthenium single-atom doping-driven modulation of Co3O4 spinel tetrahedral site 3d-orbital occupancy in lithium–oxygen batteries
Source: Royal Society of Chemistry journal article supplement (doi:10.1039/d3nr06505g), 2024-01-01
Supplement: d3nr06505g1.pdf [file d3nr06505g1.pdf]

**Ruthenium single-atom doping-driven modulation of Co<sub>3</sub>O<sub>4</sub> spinel tetrahedral site 3d-orbital occupancy in lithium-oxygen batteries**

*Yining Fan<sup>a,#</sup>, Ting Li<sup>a,#</sup>, Bin Li<sup>a,#</sup>, Anjun Hu<sup>a,b,\*</sup>, Dongfen Li<sup>b</sup>, Kun Li<sup>a</sup>, Borui Yang<sup>a</sup>, Yu Pan<sup>a</sup>, Jing Liu<sup>a,\*</sup>, Jianping Long<sup>a,\*</sup>*

<sup>a</sup> College of Materials and Chemistry & Chemical Engineering, Chengdu University of Technology, 1#, Dongsanlu, Erxianqiao, Chengdu 610059, Sichuan, P. R. China

<sup>b</sup> College of Computer Science and Cyber Security, Chengdu University of Technology, 1#, Dongsanlu, Erxianqiao, Chengdu 610059, Sichuan, P. R. China

# These authors contributed to this work equally.

\*Corresponding author: anjunhu@cdut.edu.cn (Anjun Hu); jingliu@cdut.edu.cn (Jing Liu); longjianping@cdut.cn (Jianping Long)

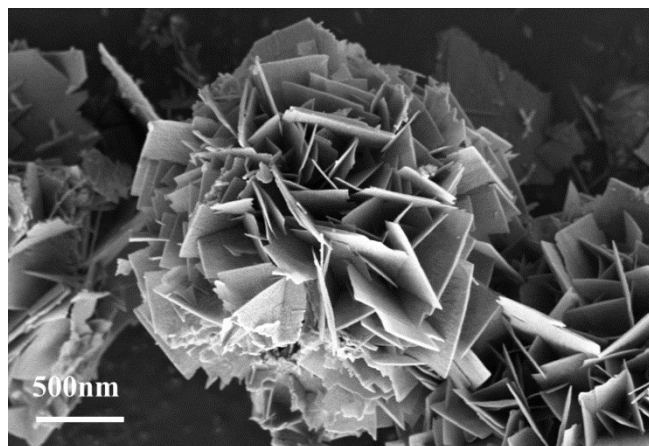

**Figure S1.** SEM images of the Co<sub>3</sub>O<sub>4</sub>.

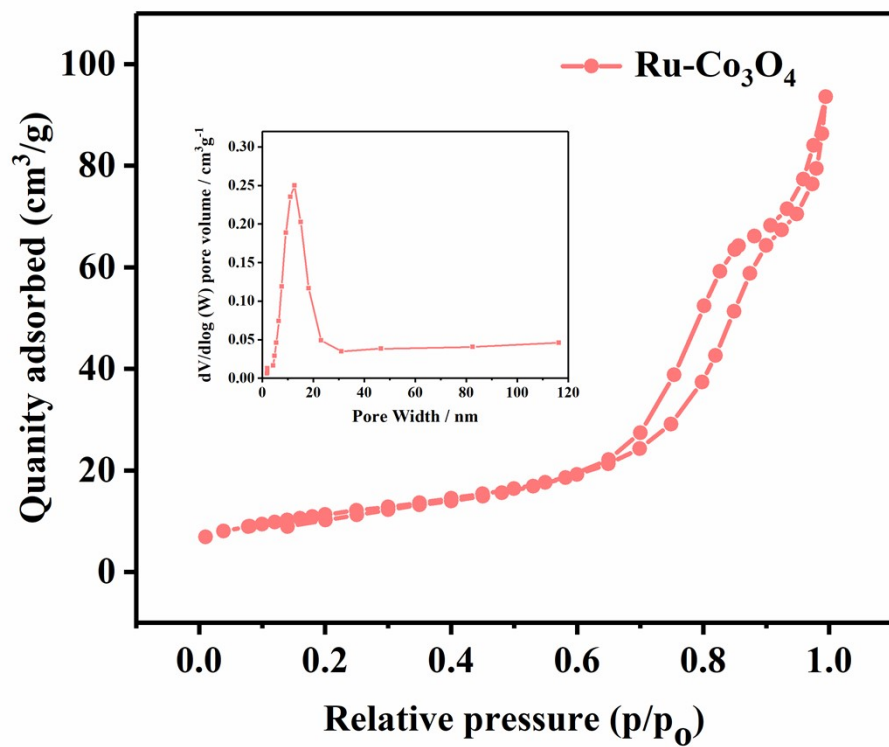

Figure S2. Nitrogen adsorption/desorption isotherms of Ru-Co<sub>3</sub>O<sub>4</sub>

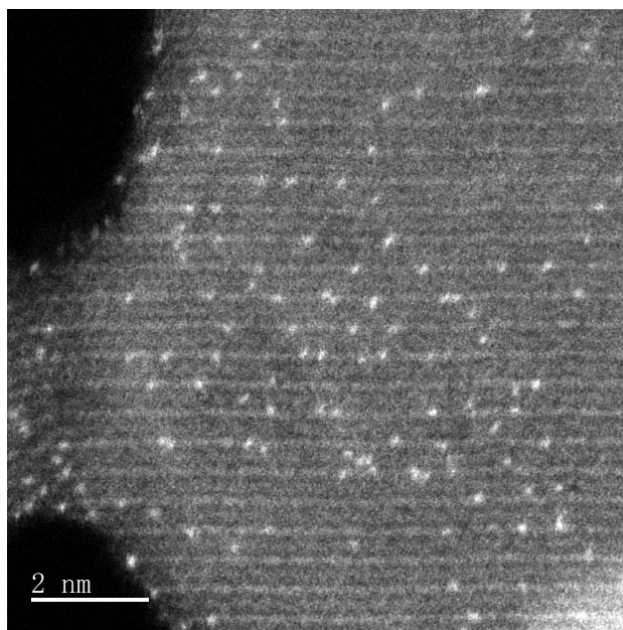

**Figure S3.** Aberration-corrected HAADF-STEM observation for Ru-Co<sub>3</sub>O<sub>4</sub>.

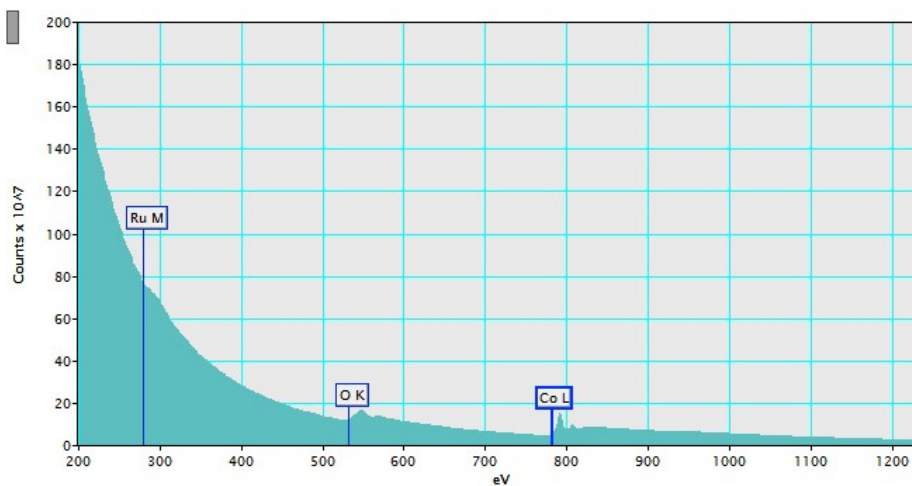

**Figure S4.** Single-atom EELS spectra extracted from two atomic positions highlighted in blue and yellow in Fig.1g.

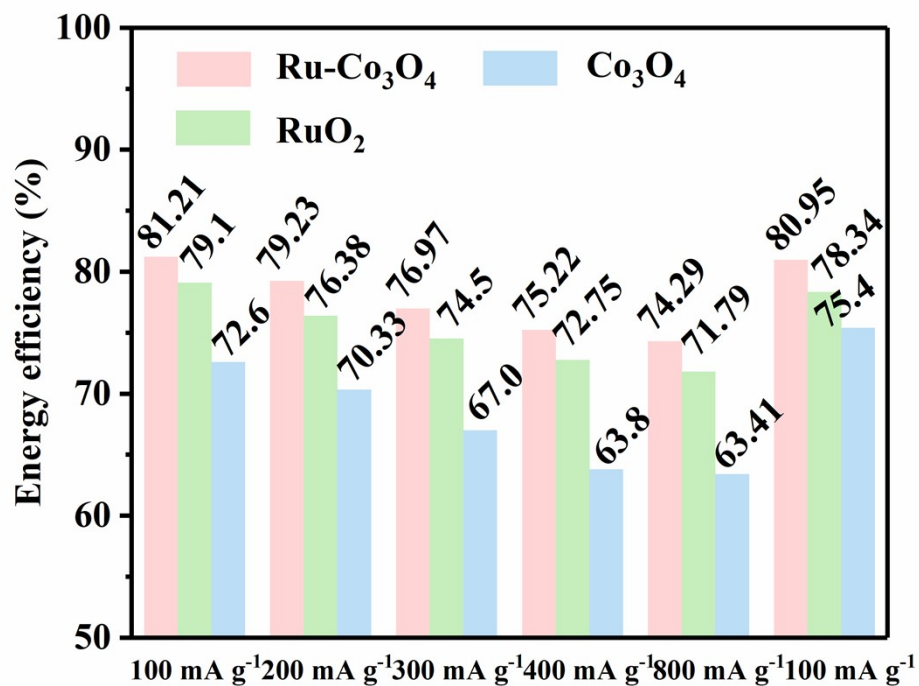

**Figure S5.** The energy efficiency of Ru-Co<sub>3</sub>O<sub>4</sub>, RuO<sub>2</sub> and Co<sub>3</sub>O<sub>4</sub> at different current density in LOBs.

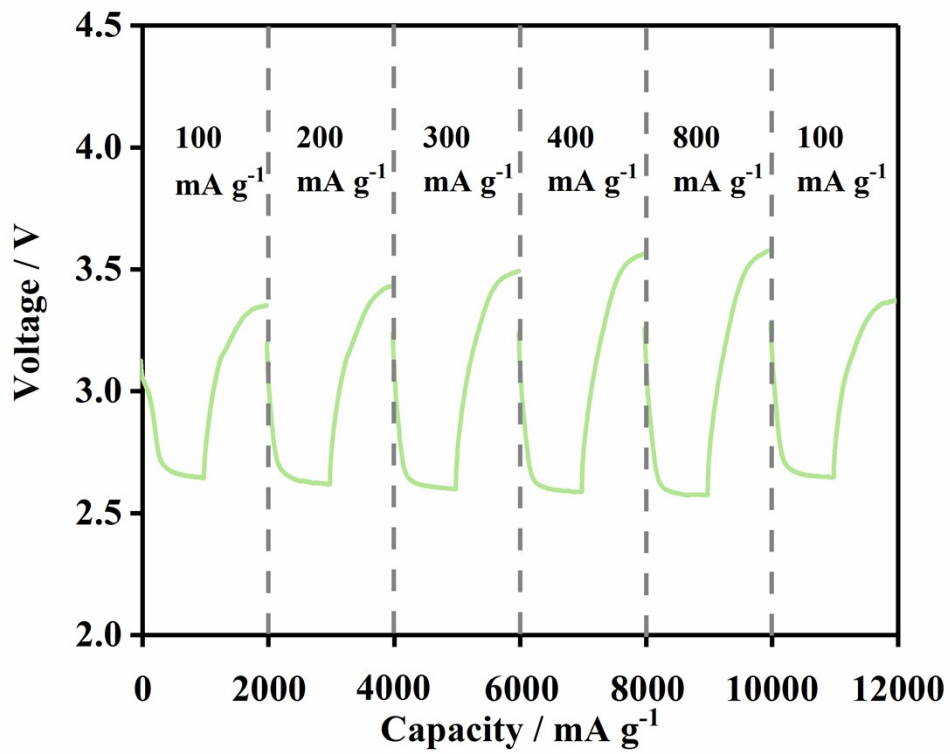

Figure S6. Rate capability of RuO<sub>2</sub> based Li-O<sub>2</sub> batteries.

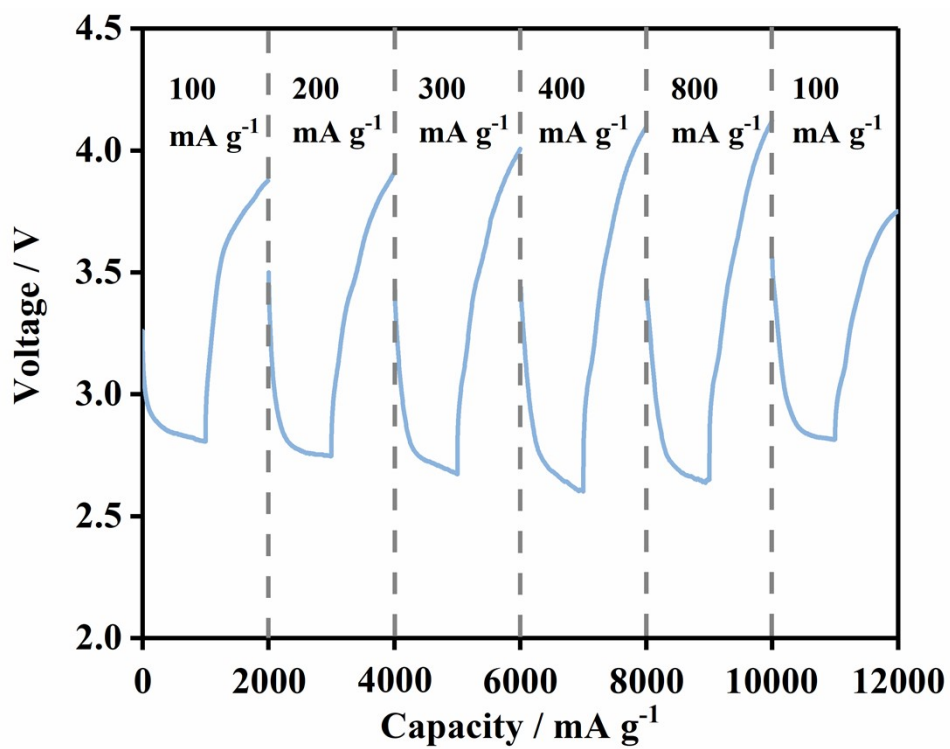

Figure S7. Rate capability of  $\text{Co}_3\text{O}_4$  based  $\text{Li-O}_2$  batteries.



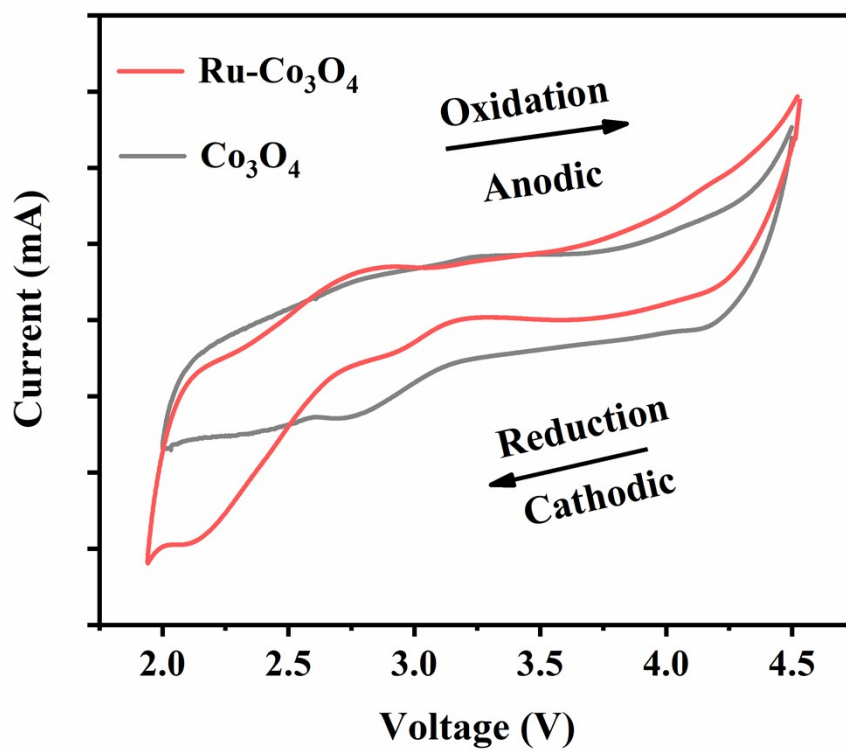

Figure S8. CV curves of Ru-Co<sub>3</sub>O<sub>4</sub> and Co<sub>3</sub>O<sub>4</sub> under the voltage window of 2.0-4.5 V and the scanning rate of 0.1 mV s<sup>-1</sup>.

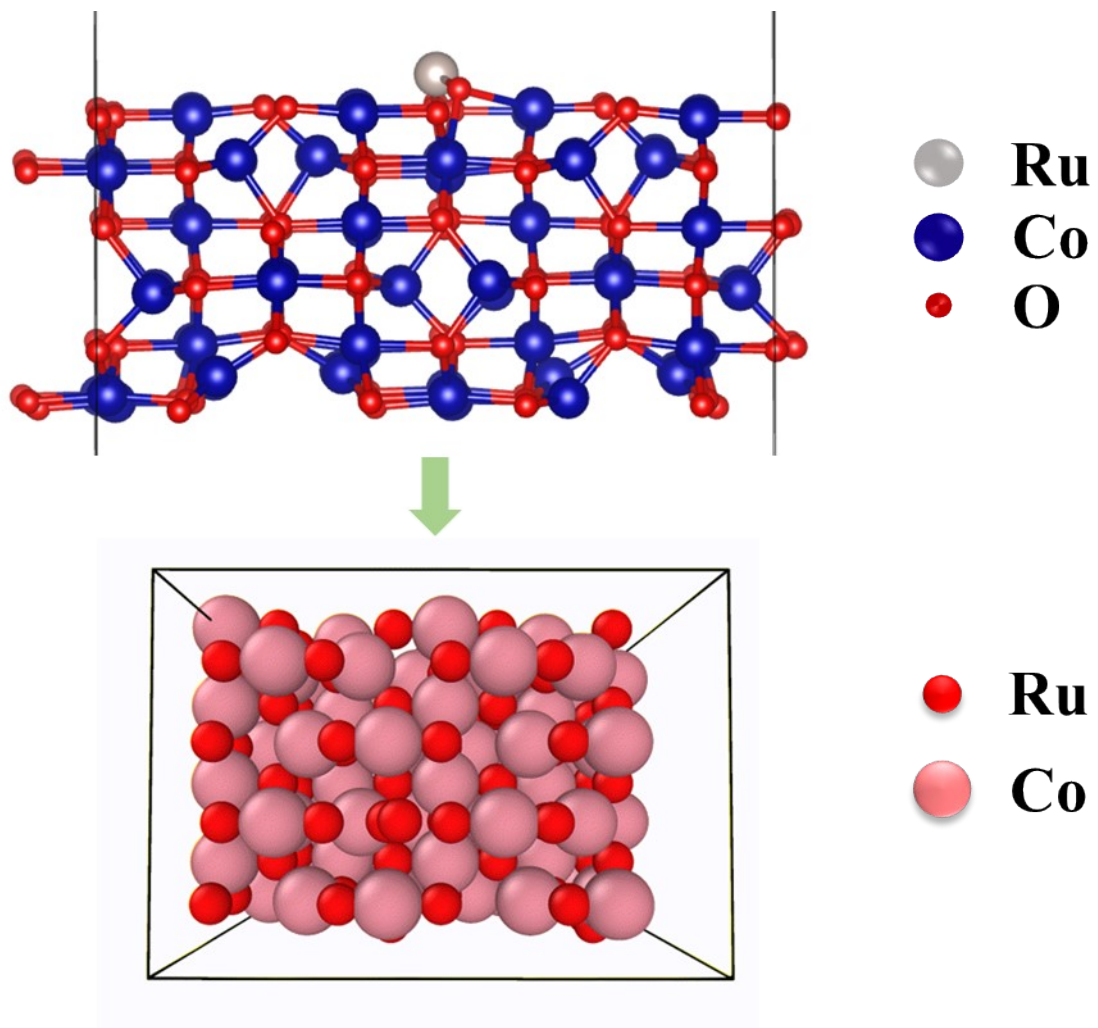

Figure S9. Gif is an optimization process, and Ru atoms are automatically migrated to the tetrahedron Co.

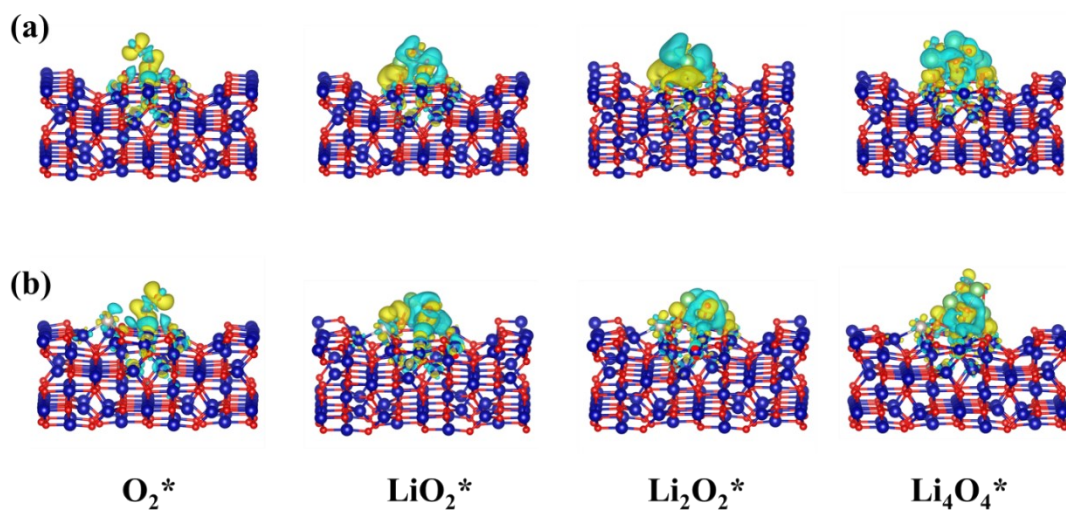

Figure S10. Electron localization function and charge density difference plots of different adsorbates (LiO<sub>2</sub>\*, Li<sub>2</sub>O<sub>2</sub>\*, Li<sub>4</sub>O<sub>4</sub>\*, and O<sub>2</sub>\*) on (a) Co<sub>3</sub>O<sub>4</sub> and (b) Ru-Co<sub>3</sub>O<sub>4</sub>.

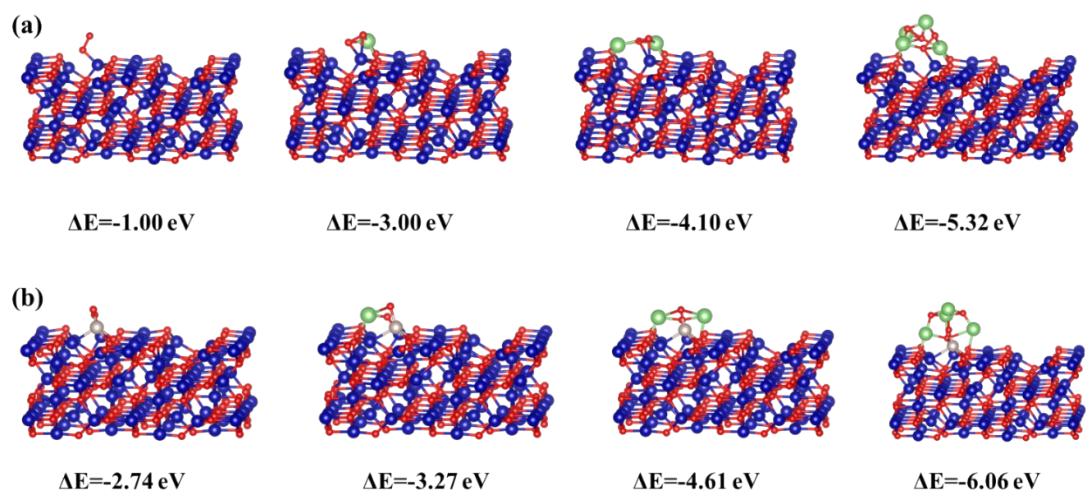

Figure S11. Binding energies and optimized structures of  $O_2$ ,  $LiO_2$ ,  $Li_2O_2$  and  $(Li_2O_2)_2$  at tetrahedral Co sites on the (a)  $Co_3O_4$  and (b)  $Ru-Co_3O_4$

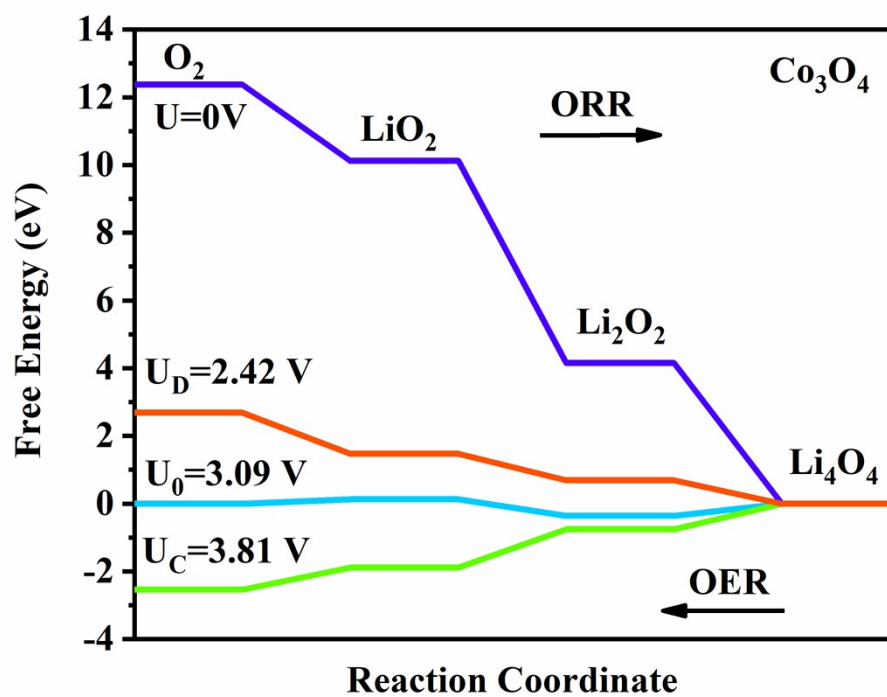

Figure S12. The free energy diagrams of ORR/OER process on  $\text{Co}_3\text{O}_4$ .

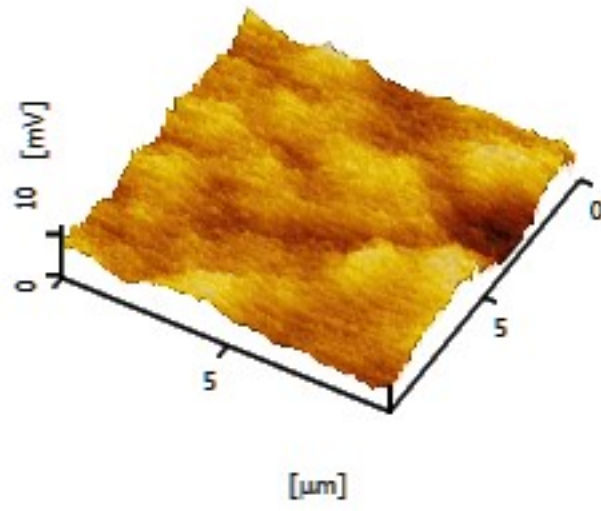

Figure S13. The surface work function of Ru-Co<sub>3</sub>O<sub>4</sub>.

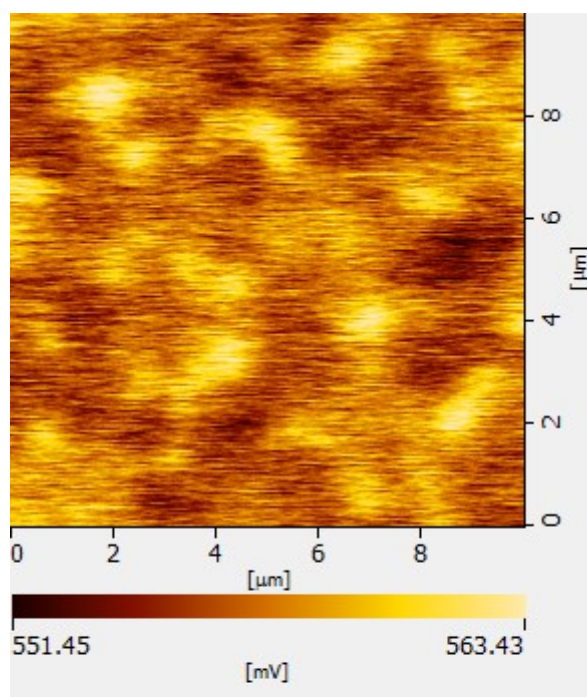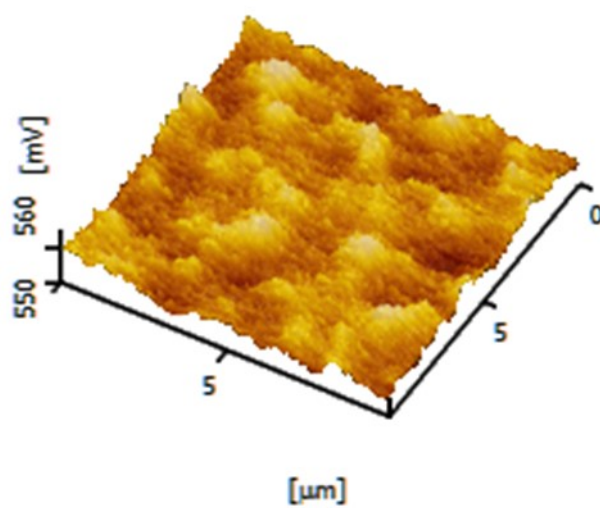

Figure S14. The surface work function of  $\text{Co}_3\text{O}_4$ .

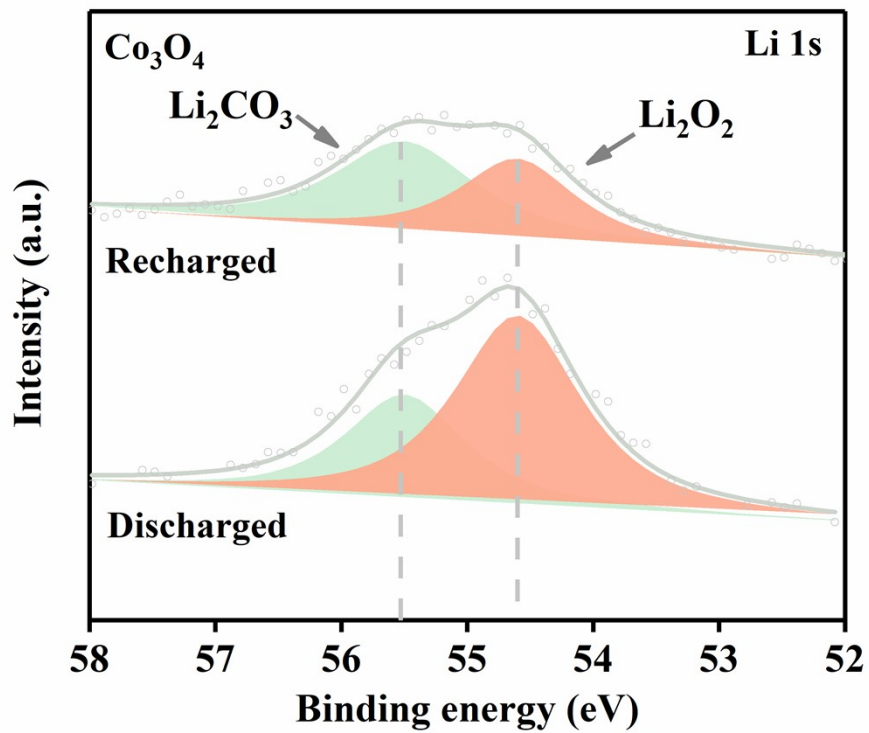

Figure S15. Li 1s XPS of  $\text{Co}_3\text{O}_4$ .



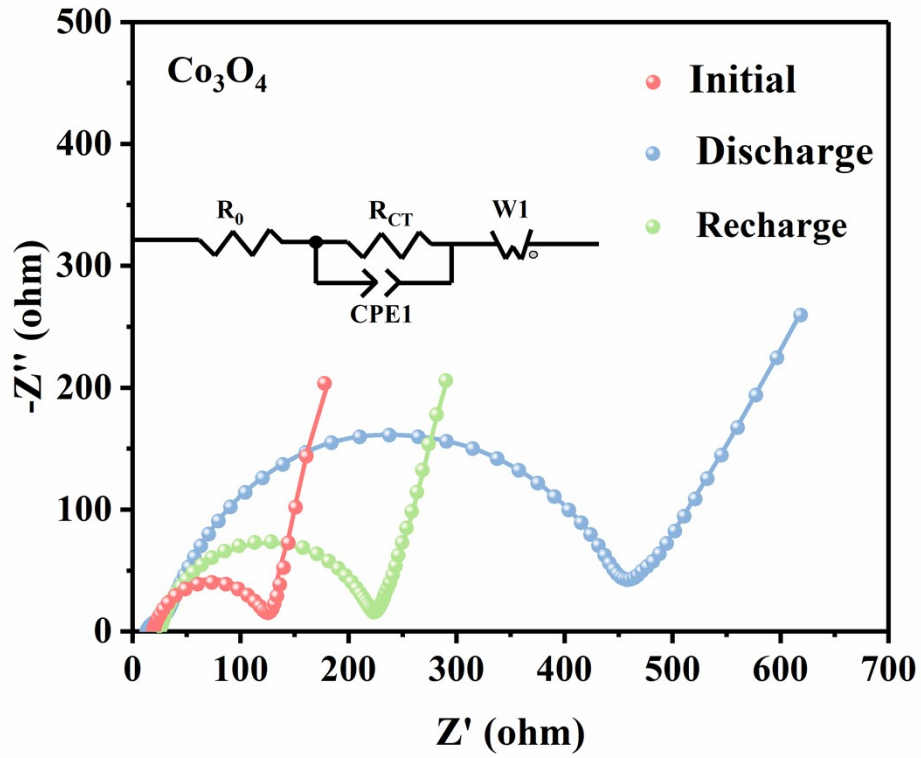

Figure S16. Nyquist plots of  $\text{Co}_3\text{O}_4$  as cathode catalyst in LOBs at initial, 1st full discharge, and 1st full recharge.

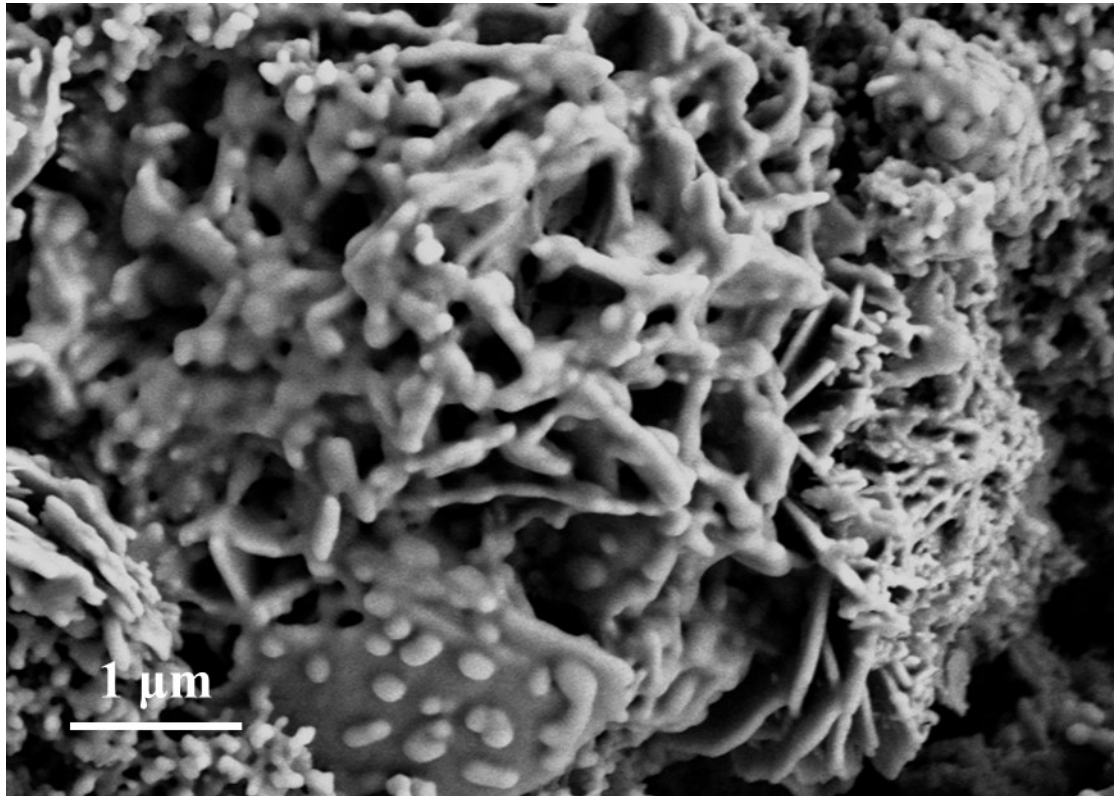

Figure S17. SEM image of Ru-Co<sub>3</sub>O<sub>4</sub>-based LOBs after charge-discharge cycles test.

**Table S1. The comparison in catalytic performance between the Ru-Co<sub>3</sub>O<sub>4</sub> battery and other batteries with different oxygen electrodes.**

| Catalyst                                 | Electrolyte          | Current density (mA/g) | Full discharge capacity (mAh/g) | Cycling conditions (current density and fixed capacity) | Cycle Number (cycles) | Reference                                                       |
|------------------------------------------|----------------------|------------------------|---------------------------------|---------------------------------------------------------|-----------------------|-----------------------------------------------------------------|
| Ru-Co <sub>3</sub> O <sub>4</sub>        | 1 M LiTFSI in TEGDME | 100                    | 25000                           | 300 mA/g<br>500<br>mAh/g                                | Over<br>500           | This work                                                       |
| Ru-Co <sub>3</sub> O <sub>4</sub>        | 1 M LiTFSI in TEGDME | 200                    | 16861                           | 200 mA/g<br>500<br>mAh/g                                | Over<br>180           | Angewandte Chemie International Edition 62(15) (2023)           |
| N-doped carbon sphere synthesized by MOF | 1 M LiTFSI in TEGDME | 500                    | 18762                           | 500 mA/g<br>1000<br>mAh/g                               | Over<br>200           | International Journal of Energy Research 45(5) (2021) 7120-7128 |
